# Supplementary material for: Epidemiology of Type 1 Diabetes Mellitus in Korea through an Investigation of the National Registration Project of Type 1 Diabetes for the Reimbursement of Glucometer Strips with Additional Analyses Using Claims Data
Source: PubMed Central journal article supplement — Diabetes Metab J. 2015 Dec 1;40(1):35–45. doi: 10.4093/dmj.2016.40.1.35 (PMC4768049; doi:10.4093/dmj.2016.40.1.35), 2015-12-01
Supplement: dmj-40-35-s001.pdf [file dmj-40-35-s001.pdf]

**Supplementary Table 1.** Classification of diabetes mellitus type according to ICD-10 from Claim Data

| Classification of diabetes mellitus type according to ICD-10                                                        | Number     |
|---------------------------------------------------------------------------------------------------------------------|------------|
| Type 1 diabetes mellitus                                                                                            | 227,280    |
| Classification according to codes of disease classification symbol                                                  |            |
| Requested type 1 code only                                                                                          | 37,947     |
| Also requested other type codes with type 1 code                                                                    | 189,333    |
| Classification by the number of insulin prescription                                                                |            |
| 0                                                                                                                   | 141,516    |
| 1 time                                                                                                              | 85,764     |
| 2 times                                                                                                             | 55,385     |
| 3 times or more                                                                                                     | 44,747     |
| Classification according to the type of prescription drugs                                                          |            |
| Did not receive any prescription                                                                                    | 95,400     |
| Received one or more prescriptions for insulin only, but not OHA                                                    | 45,077     |
| Received one or more prescriptions for only OHA, but not insulin                                                    | 43,706     |
| Received both insulin and OHA                                                                                       | 43,097     |
| Type 2 diabetes mellitus                                                                                            | 3,224,091  |
| Malnutrition-related diabetes                                                                                       | 8,573      |
| Other specific type of diabetes mellitus & type unknown diabetes mellitus                                           | 1,190,405  |
| Total number of diabetes in Korea (real number of type 1, 2, 3, and other form diabetes except for the duplication) | 3,762,332  |
| The number of health insurance subscribers during the study period                                                  | 49,662,097 |

OHA, oral hypoglycemic agent.
