# Supplementary material for: Epidemiology of Type 1 Diabetes Mellitus in Korea through an Investigation of the National Registration Project of Type 1 Diabetes for the Reimbursement of Glucometer Strips with Additional Analyses Using Claims Data
Source: PubMed Central journal article supplement — Diabetes Metab J. 2015 Dec 1;40(1):35–45. doi: 10.4093/dmj.2016.40.1.35 (PMC4768049; doi:10.4093/dmj.2016.40.1.35), 2015-12-01
Supplement: dmj-40-35-s002.pdf [file dmj-40-35-s002.pdf]

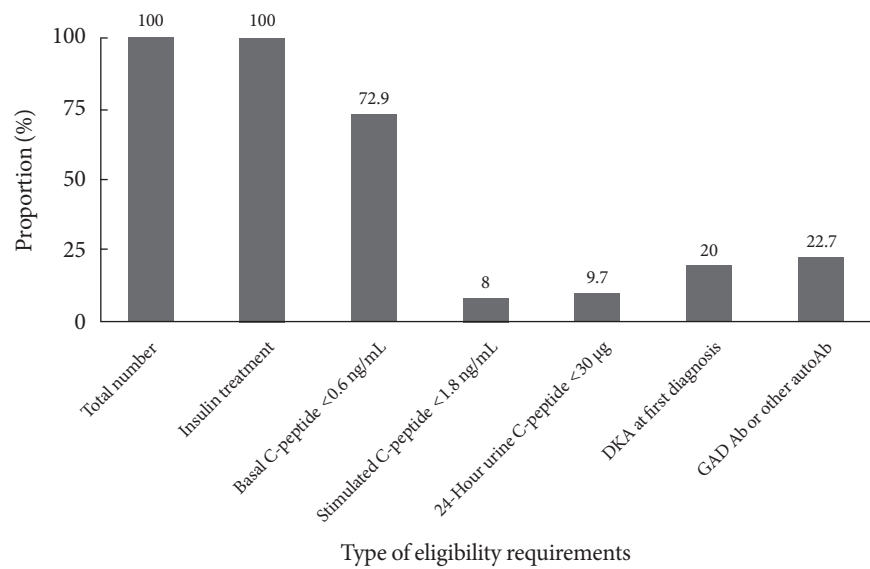

**Supplementary Fig. 1.** Registration eligibility requirements of the Korean Type 1 Diabetes Mellitus Registry. Insulin treatment was a mandatory requirement. Optional conditions showed insulin deficiency or presence of autoimmunity, such as basal C-peptide levels below 0.6 ng/mL, stimulated C-peptide levels below 1.8 ng/mL, urine C-peptide levels below 30 µg for 24 hours, a history of diabetic ketoacidosis (DKA) at first diagnosis of diabetes mellitus, or the presence of autoantibodies to pancreatic  $\beta$ -cells, including glutamicacid-decarboxylase (GAD) antibodies (Ab). Registrants could have more than one optional condition.
