# Supplementary material for: Epidemiology of Type 1 Diabetes Mellitus in Korea through an Investigation of the National Registration Project of Type 1 Diabetes for the Reimbursement of Glucometer Strips with Additional Analyses Using Claims Data
Source: PubMed Central journal article supplement — Diabetes Metab J. 2015 Dec 1;40(1):35–45. doi: 10.4093/dmj.2016.40.1.35 (PMC4768049; doi:10.4093/dmj.2016.40.1.35), 2015-12-01
Supplement: dmj-40-35-s003.pdf [file dmj-40-35-s003.pdf]

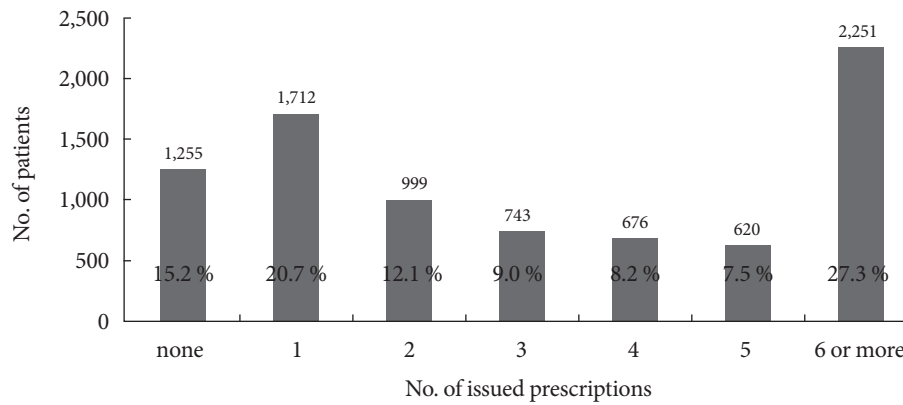

**Supplementary Fig. 2.** The number of issued prescriptions for consumable supplies per patient. The 1,255 patients (15.2%) registered but did not have any prescriptions for consumable supplies. The 27.3% ( $n=2,251$ ) of the registry received prescriptions six or more times.
